# Supplementary material for: Postdischarge prognostic significance of periprocedural myocardial injury after percutaneous intervention of chronic total occlusion
Source: HighWire-hosted journal article supplement (doi:10.1136/openhrt-2022-002113), 2022-12-01
Supplement: openhrt-2022-002113supp002_data_supplement.pdf [file openhrt-2022-002113supp002_data_supplement.pdf]

**Supplemental table 2: Baseline characteristics and procedural parameters according to post-procedural hs-TnT ( $\geq 70$ x ULN).**

| Variable                    | No<br>elevation<br>(n=471) | Elevated<br>$\geq 70$ x ULN<br>(n=12) | <i>p</i> value   |
|-----------------------------|----------------------------|---------------------------------------|------------------|
| Age (years)                 | 65 (57-73)                 | 69 (63-77)                            | 0.071            |
| Male                        | 405 (86)                   | 6 (50)                                | <b>&lt;0.001</b> |
| Current smoker              | 110 (23)                   | 3 (25)                                | 0.894            |
| Hypertension                | 307 (65)                   | 8 (67)                                | 0.915            |
| Dyslipidemia                | 391 (83)                   | 9 (75)                                | 0.467            |
| Diabetes mellitus           | 127 (27)                   | 2 (17)                                | 0.426            |
| Previous MI                 | 167 (36)                   | 6 (50)                                | 0.299            |
| Previous CABG               | 49 (10)                    | 1 (8)                                 | 0.816            |
| Previous PCI                | 203 (43)                   | 8 (67)                                | 0.104            |
| Previous stroke             | 20 (4)                     | 2 (17)                                | <b>0.042</b>     |
| Peripheral vascular disease | 75 (16)                    | 5 (42)                                | <b>0.018</b>     |
| Chronic kidney disease      | 98 (21)                    | 4 (33)                                | 0.311            |
| Stable angina               | 295 (63)                   | 4 (36)                                | 0.071            |
| Multivessel disease         | 238 (55)                   | 4 (33)                                | 0.138            |
| <i>Left Ventricular EF</i>  |                            |                                       | <b>0.038</b>     |
| <35%                        | 34 (7)                     | 3 (25)                                |                  |
| 35 – 59%                    | 143 (31)                   | 5 (42)                                |                  |
| $\geq 60\%$                 | 282 (61)                   | 4 (33)                                |                  |
| In-stent occlusion          | 42 (9)                     | 1 (8)                                 | 0.942            |
| J-CTO score                 | 1.72 $\pm$ 1.25            | 1.67 $\pm$ 1.23                       | 0.884            |

|                             |          |        |       |
|-----------------------------|----------|--------|-------|
| <i>J-CTO score (Class)</i>  |          |        | 0.259 |
| Easy (0)                    | 90 (19)  | 3 (25) |       |
| Intermediate (1)            | 125 (27) | 1 (8)  |       |
| Difficult (2)               | 133 (28) | 6 (50) |       |
| Very difficult ( $\geq 3$ ) | 123 (26) | 2 (17) |       |
| CTO length >20mm            | 226 (48) | 6 (50) | 0.896 |

Values expressed as median (interquartile range), mean (standard deviation) or n (%).
