# Supplementary material for: Postdischarge prognostic significance of periprocedural myocardial injury after percutaneous intervention of chronic total occlusion
Source: HighWire-hosted journal article supplement (doi:10.1136/openhrt-2022-002113), 2022-12-01
Supplement: openhrt-2022-002113supp003_data_supplement.pdf [file openhrt-2022-002113supp003_data_supplement.pdf]

**Supplemental table 3: Procedural characteristics according to post-procedural hs-TnT ( $\geq 70$ x ULN).**

| Variable                                       | No<br>elevation<br>(n=471) | Elevated<br>$\geq 70$ x ULN<br>(n=12) | p value          |
|------------------------------------------------|----------------------------|---------------------------------------|------------------|
| <i>CTO target vessel</i>                       |                            |                                       |                  |
| Right coronary artery                          | 255 (54)                   | 8 (67)                                | 0.390            |
| Left anterior descending artery                | 129 (27)                   | 3 (25)                                | 0.855            |
| Circumflex artery                              | 84 (18)                    | 1 (8)                                 | 0.393            |
| Left main coronary artery                      | 3 (0.6)                    | 0 (0.0)                               | 0.782            |
| Stenting performed                             | 384 (82)                   | 10 (83)                               | 0.873            |
| Stent length >48mm                             | 212 (55)                   | 6 (60)                                | 0.757            |
| Procedure time (min)                           | 75 (45-101)                | 101 (48-124)                          | 0.172            |
| Fluoroscopy time (min)                         | 24 (15-37)                 | 41 (20-68)                            | <b>0.028</b>     |
| Technical success                              | 383 (81)                   | 9 (75)                                | 0.581            |
| Procedural success without major complications | 379 (81)                   | 5 (42)                                | <b>0.001</b>     |
| Major complications                            | 12 (3)                     | 6 (50)                                | <b>&lt;0.001</b> |
| Major vascular complications                   | 4 (0.8)                    | 0 (0.0)                               | 0.749            |

Values expressed as median (interquartile range) or n (%).
